1 Orally Bioavailable Endochin-like Quinolone Carbonate Ester Prodrug Reduces  
2 *Toxoplasma gondii* Brain Cysts

3

4 J. Stone Doggett,<sup>a,b,#</sup> Tracey Schultz,<sup>c</sup> Alyssa J. Miller,<sup>d,e,f,g</sup> Igor Bruzual,<sup>b</sup> Sovitj Pou,<sup>b</sup>  
5 Rolf Winter,<sup>b</sup> Rozalia Dodean,<sup>b</sup> Lev N. Zakharov,<sup>h</sup> Aaron Nilsen,<sup>a</sup> Michael K Riscoe,<sup>a,b</sup>  
6 Vern B Carruthers<sup>c</sup>

7 <sup>a</sup> Division of Infectious Diseases, Oregon Health & Science University School of  
8 Medicine, Portland, OR 97239, USA

9 <sup>b</sup> Department of Hospital and Specialty Medicine, Veterans Administration Portland  
10 Healthcare System, Portland, OR 97239, USA

11 <sup>c</sup> Department of Microbiology and Immunology, University of Michigan Medical School,  
12 Ann Arbor, MI 48109, USA

13 <sup>d</sup> Program in Cell and Molecular Biology, University of Michigan Medical School, Ann  
14 Arbor, MI 48109, USA

15 <sup>e</sup> Department of Internal Medicine, Gastroenterology, University of Michigan Medical  
16 School, Ann Arbor, MI 48109, USA

17 <sup>f</sup> Present address: Institute for Regenerative Medicine, Perelman School of Medicine,  
18 University of Pennsylvania, Philadelphia, PA 19104, USA

19 <sup>g</sup> Present address: Penn Epigenetics Institute, Perelman School of Medicine, University  
20 of Pennsylvania, Philadelphia, PA 19104, USA

21 <sup>h</sup> Department of Chemistry, University of Oregon, Eugene, OR 97403, USA

22 Running title: ELQ Prodrug Effective against Toxoplasmosis

23 <sup>#</sup> Address Correspondence to J. Stone Doggett, [doggettj@ohsu.edu](mailto:doggettj@ohsu.edu)

24 **Abstract**

25 Toxoplasmosis is a potentially fatal infection for immunocompromised people and  
26 the developing fetus. Current medicines for toxoplasmosis have high rates of adverse  
27 effects that interfere with therapeutic and prophylactic regimens. Endochin-like  
28 quinolones (ELQs) are potent inhibitors of *Toxoplasma gondii* proliferation *in vitro* and in  
29 animal models of acute and latent infection. ELQ-316, in particular, was found to be  
30 effective orally against acute toxoplasmosis in mice and highly selective for the *T. gondii*  
31 cytochrome *b* over the human cytochrome *b*. Despite oral efficacy, the high crystallinity  
32 of ELQ-316 limits oral absorption, plasma concentrations and therapeutic potential. A  
33 carbonate ester prodrug of ELQ-316, ELQ-334, was created to decrease crystallinity  
34 and increase oral bioavailability, which resulted in a six-fold increase in both  $C_{\max}$   
35 (maximum plasma concentration) and AUC (area under the curve) of ELQ-316. The  
36 increased bioavailability of ELQ-316, when administered as ELQ-334, resulted in  
37 greater efficacy than the equivalent dose of ELQ-316 against acute toxoplasmosis and  
38 had similar efficacy against latent toxoplasmosis compared to intraperitoneal  
39 administration of ELQ-316. Carbonate ester prodrugs are a successful strategy to  
40 overcome the limited oral bioavailability of ELQs for the treatment of toxoplasmosis.

## 41 **Introduction**

42 *Toxoplasma gondii* infection is highly prevalent in humans, parasitizing billions of  
43 people.(1) In the great majority of infections, symptoms are not appreciable; however,  
44 infected individuals are at risk of developing toxoplasmosis if they become  
45 immunologically comprised by HIV infection, cancer or immunosuppressive therapies.  
46 Infection during pregnancy can cause fetal demise, and severe congenital neurological  
47 and ocular damage. Outside of immunocompromised populations, otherwise healthy  
48 people may develop eye disease from *T. gondii* infection that can progress to blindness.  
49 Additionally, *T. gondii* causes severe infection in wild and domesticated animals and  
50 may threaten endangered species.(2, 3)

51 Current multidrug regimens for toxoplasmosis have had high rates of adverse  
52 events leading to discontinuation in 30% of patients.(4-6) The most common adverse  
53 events were rash, diarrhea, hematologic and hepatic toxicity.(5) High rates of  
54 hematologic toxicity are related to pyrimethamine inhibition of the host dihydrofolate  
55 reductase enzyme, and high rates of allergic reactions and overlapping toxicities with  
56 medications used in populations that are susceptible to toxoplasmosis. These groups  
57 also have higher rates of severe reactions such as toxic epidermal necrolysis and  
58 Stevens-Johnson syndrome that may be fatal.(7) The toxicities of current therapy are  
59 made worse by the prolonged exposure that patients must undergo in the initial  
60 treatment phase and the suppressive secondary prophylaxis phase. In part, the long  
61 duration of treatment is required because *T. gondii* tissue cysts are not eradicated by  
62 current regimens. New treatments that are less toxic and diminish or eliminate latent *T.*  
63 *gondii* tissue cysts would greatly improve outcomes for patients with toxoplasmosis.

64 Endochin-like quinolones (ELQ) are potent inhibitors of apicomplexan pathogens  
65 including *T. gondii*, *Plasmodium falciparum*, and *Babesia microti*. ELQ-316 was  
66 identified as a lead compound for toxoplasmosis based on efficacy and specificity for  
67 the *T. gondii* cytochrome *b* over the human cytochrome *b*.(8) Despite efficacy when  
68 administered orally in systemic mouse models of toxoplasmosis, malaria and  
69 babesiosis, ELQ-316 plasma and brain concentrations were not adequate to eliminate  
70 acute *T. gondii* brain infection.(9) Increasing the dose of ELQ-316 to attain adequate  
71 tissue concentrations was limited by the crystallinity of ELQs, because the bioavailability  
72 of ELQs decreases as the dose increases due to precipitation in the gastrointestinal  
73 tract at higher concentrations.(10) In order to improve the oral efficacy of ELQ-316, we  
74 created a carbonate ester prodrug of ELQ-316, ELQ-334, and determined the  
75 pharmacokinetic parameters and efficacy against acute and latent toxoplasmosis.

## 76 **Results**

### 77 **Extended treatment of latent *T. gondii* brain infection with ELQ-316 and ELQ-271**

78 Previously, ELQ-316 and ELQ-271 were shown to reduce established brain cysts  
79 when administered intraperitoneally for 15 days.(8) Based on these results, we tested a  
80 longer duration of treatment against established tissue cysts. In these experiments,  
81 CBA/J mice were infected with the ME49 *T. gondii* strain for 5 weeks prior to treatment  
82 to establish chronic brain tissue cysts. ELQs were administered to mice for 5 weeks IP  
83 at 5 mg/kg/d. This course reduced the number of brain tissue cysts rapidly within the  
84 first week with continued reduction compared to control at 5 weeks (Fig. 1A and 1B).  
85 Following treatment with ELQs, mice were given dexamethasone to evaluate the  
86 viability of the remaining cysts. Survival was prolonged in the majority of mice treated

87 with ELQ-316; however, all mice eventually succumbed to infection indicating that viable  
88 cysts remained after treatment (Fig. 1C). Together, these findings suggest that  
89 prolonged treatment substantially reduces but does not completely eliminate viable  
90 cysts.

### 91 **Chemical Synthesis of ELQ-334**

92 A prodrug form of ELQ-316 was synthesized to increase oral bioavailability. ELQ-  
93 334 has been previously reported without detail of its synthesis and structural  
94 characterization.<sup>(11)</sup> In this manuscript we describe its synthesis with full  
95 characterization of the structure including X-ray diffraction analysis of ELQ-334 crystals.  
96 Following a procedure modified from Miley et al.,<sup>(12)</sup> 6-fluoro-7-methoxy-2-methyl-3-(4-  
97 (4-(trifluoromethoxy)phenoxy)phenyl)quinolin-4-yl ethyl carbonate (ELQ-334) was  
98 obtained by reacting ethyl chloroformate with 6-fluoro-7-methoxy-2-methyl-3-(4-(4-  
99 (trifluoromethoxy)phenoxy)phenyl)quinolin-4(1H)-one (ELQ-316)<sup>(13)</sup> in the presence of  
100 sodium hydride at 60°C in 95% yield as a white solid (Fig. 2). Whereas ELQ-316  
101 decomposes at 314°C, ELQ-334 exhibits a melting point of 140°C, consistent with a  
102 significant loss of crystallinity.

103 The X-ray crystal structure of ELQ-334 contains two symmetrically independent  
104 molecules as shown in Fig. S1. The central planar quinoline ring and the first phenyl  
105 ring of the diaryl ether is twisted with a 68° torsion angle around the C2-C15 bond.  
106 Weak intermolecular hydrogen bonding networks between C-H...N and C-H...OCH<sub>3</sub>  
107 are also observed in the crystal structures. The packing does not provide any evidence  
108 that the molecules in the crystal are connected via  $\pi$ - $\pi$  stacking interactions. The diaryl  
109 ether group is significantly twisted from the central quinoline aromatic group to disrupt

110 possible intermolecular  $\pi$ - $\pi$  interactions. The absence of  $\pi$ - $\pi$  stacking is consistent  
111 with the low melting point of 140°C.

### 112 **Noncompartmental Pharmacokinetic analysis of ELQ-316 and ELQ-334**

113 ELQ-316 and ELQ-334 were administered orally to mice, and then plasma and  
114 brain concentrations were measured to compare the maximum concentration ( $C_{max}$ ),  
115 time to  $C_{max}$  ( $T_{max}$ ), area under the curve from time 0-96hr ( $AUC_{0-96}$ ), and half-life ( $t_{1/2}$ ) of  
116 ELQ-316 from ELQ-316 and ELQ-334. Compounds were dissolved in polyethylene  
117 glycol (PEG) 400 at a single dose of 10 mg/kg of ELQ-316. ELQ-334 yielded a plasma  
118  $C_{max}$  of 4,378 ng/ml compared to 721 ng/ml of ELQ-316 from ELQ-316. The  $T_{max}$  of both  
119 compounds was 4 hours and the  $AUC_{0-96}$  was also increased approximately 6-fold to  
120 115,195 ng/ml\*h by the carbonate ester promoiety. The ELQ-316 plasma concentration  
121 of 1,665 ng/ml from ELQ-334 at 24 hours and the  $t_{1/2}$  of 11.6 hours predicts efficacy with  
122 once daily dosing. The brain tissue concentrations of ELQ-316 from ELQ-334 were  
123 1,543 ng/ml at 4 hours and 405 ng/ml at 24 hours. The brain tissue to plasma  
124 concentration ratio was 0.35 at plasma  $T_{max}$ . By comparison, the brain concentrations  
125 achieved from the oral dose of ELQ-316 were 165 ng/g at  $T_{max}$  and 75 ng/g at 24 hours.  
126 The mean plasma concentration of ELQ-334 did not exceed 238 ng/ml (5% of  $C_{max}$ )  
127 indicating that conversion from the prodrug ELQ-334 to active compound ELQ-316  
128 occurs very quickly and, may be caused in part by esterases present in the  
129 gastrointestinal tract. Pharmacokinetic analysis was performed with PKSolver  
130 software.(14)

### 131 **Efficacy of ELQ-334 against acute toxoplasmosis**

132 ELQ-334 increased survival in mice at 5 mg/kg against a virulent *T. gondii* strain  
133 that is uniformly fatal in mice. ELQ-334 was given orally to mice at 1 or 5 mg/kg/d for 5  
134 days following infection with RH strain *Toxoplasma gondii* for 24 hours. Treatment with  
135 5 mg/kg/d prolonged survival in all mice with 2 out of 4 mice surviving through the  
136 conclusion of the experiment at 33 days. Control mice and mice treated with 1 mg/kg/d  
137 ELQ-334 were euthanized 6 and 7 days after displaying overt signs of infection,  
138 respectively. In the group treated with 5 mg/kg/d of ELQ-334, mice were euthanized at  
139 day 17 and day 20 after infection. The survival of the mice treated with ELQ-334 at 5  
140 mg/kg was statistically greater than the control mice ( $p=0.008$ ). In previously published  
141 experiments of ELQ-316 at 5 mg/kg/d in the same model, mice were euthanized at 13  
142 days wherein systemic infection was cleared, but brain infection progressed.(15) These  
143 results suggest that the increased plasma concentration from ELQ-334 either prevents  
144 brain infection from becoming established or results in brain concentrations of ELQ-316  
145 that are adequate to treat acute infection.

#### 146 **Treatment of latent *T. gondii* brain infection with ELQ-334**

147 ELQ-334, the carbonate ester prodrug of ELQ-316, was tested against latent *T.*  
148 *gondii* infection (Fig. 5). ELQ-334 given orally at 10 mg/kg for 2 weeks reduced the  
149 number of *T. gondii* cysts 67% compared to control mice that received vehicle alone  
150 and reduced the number of parasite genomes per brain 82% compared to control mice  
151 (Fig. 5B and 5C). *T. gondii* brain cysts from mice that were treated with ELQ-334 were  
152 smaller in diameter than cysts from control mice (Fig. 5D), thus providing a potential  
153 explanation for the greater reduction in parasite genomes per brain than cysts per brain  
154 due to treatment.

155           The presence of brain cysts remaining after treatment raised the possibility of  
156 inherently resistant populations of cysts or acquired drug resistance. The distribution of  
157 the cysts in the brain was examined by mechanically slicing brains into even sections  
158 from the anterior to posterior direction and estimating the total number of *T. gondii*  
159 genomes per mg of brain tissue using QRT-PCR of genomic DNA; however, no  
160 difference was observed between treated and control mice, indicating that the  
161 susceptibility of cysts to ELQ-334 was not related to cyst location (Fig. 5E and 5F). *T.*  
162 *gondii* exposed to ELQ-316 were tested for acquired resistance by infecting naïve mice  
163 with cysts from ELQ-334 treated mice and then treating again with ELQ-334. The  
164 number of cysts after treatment were equivalent to the original experiment in the mice  
165 that received ELQ-334 and the mice that received only vehicle (Fig. 5H).

166           The cytochrome *b* gene was sequenced to determine if acquired ELQ-316  
167 resistance mutations resulted in drug resistance in the remaining tissue cysts. The MS-  
168 ME49 strain that was used in the latent toxoplasmosis experiments was found to have a  
169 single nucleotide substitution resulting in a change from isoleucine to leucine at position  
170 262 in the Qo site of cytochrome *b* compared to CH-ME49 (a different lineage of ME49,  
171 see methods), the Type I RH strain used in the acute infection model and the  
172 cytochrome *b* sequence in the Toxodb database, TGME49\_330000. This mutation has  
173 previously been associated with atovaquone resistance and is located adjacent to the  
174 highly conserved PEWY region in the Qo site (Fig. 5I).(16) The I262L substitution was  
175 discovered after the above experiments were completed. This substitution was  
176 determined to be present prior to these experiments by sequencing the cytochrome *b*



177 gene of MS-ME49 *T. gondii* that was not exposed to ELQ-316, ELQ-334 or other  
178 compounds.

179 ELQ-316 resistance from cytochrome *b* Qi site mutations in *T. gondii* and *B.*  
180 *microti* has established the Qi site as the primary target of ELQ-316.(11, 15) The  
181 susceptibility of the CH-ME49 strain was tested to determine if the I262L mutation  
182 resulted in resistance or increased susceptibility (Fig. 5J). The remaining number of *T.*  
183 *gondii* cysts after treatment with ELQ-334 was not significantly different than the  
184 experiments that used the MS-ME49 strain, indicating that this substitution did not  
185 cause resistance or increased susceptibility.

#### 186 **Discussion:**

187 A drug capable of eradicating *T. gondii* tissue cysts from infected individuals  
188 would prevent recurrent toxoplasmosis in people who have suffered acute infection and  
189 potentially could be used to prevent toxoplasmosis in immunocompromised individuals  
190 with evidence of latent infection. A drug that eradicates cysts may also be effective over  
191 a shorter duration than current regimens and prevent relapses of ocular toxoplasmosis  
192 that cause scarring and vision loss. Specifically, the one-year treatment of congenital  
193 toxoplasmosis and indefinite secondary prophylaxis in immunocompromised patients  
194 could be shortened to limit drug toxicity.

195 Over the last decade, a number of compounds with efficacy against brain tissue  
196 cysts have been identified.(8, 17-19) These compounds reduced tissue cysts but did not  
197 eliminate cysts in mouse models with intact immunity. The cause of inherent drug  
198 refractivity in latent tissue cysts has not been determined. It is also not clear if drug  
199 refractivity is specific to individual inhibitors or is a general mechanism that affects many

200 drugs. A lack of metabolic vulnerability in non-replicating bradyzoites and decreased  
201 drug penetration through the cyst wall are among the possible explanations for drug  
202 resistance.

203         Extended treatment with ELQ-316 via IP injection for 5 weeks did not eradicate  
204 latent infection. Although the number of cysts was greatly reduced, the remaining cysts  
205 from the 5-week treatment were viable. *T. gondii* brain tissue cysts are dynamic over the  
206 time course of infection with cysts exhibiting varying degrees of replication and cyst  
207 packing density.(20) *T. gondii* bradyzoites express isoforms of carbon metabolism  
208 enzymes, lactate dehydrogenase and enolase, that favor glycolysis.(21-24) It has been  
209 reported that bradyzoites also lack a functional tricarboxylic acid (TCA) cycle.(25, 26)  
210 Considering these shifts in bradyzoite metabolism, cysts with replicating parasites would  
211 be vulnerable to ELQs, and cysts that are fully committed to dormancy and not reliant  
212 on oxidative phosphorylation would survive. On the other hand, cytochrome *b* inhibition  
213 induces the stage transition to bradyzoites.(27) ELQs may drive cysts with replicating  
214 parasites into latency, stopping the growth of cysts. The smaller cyst size in the ELQ  
215 treated mice may result from this growth limiting effect or be associated with an  
216 inherently recalcitrant population. That being said, the large and continued reduction in  
217 the number of cysts indicates that the great majority of brain cysts are vulnerable to  
218 cytochrome *b* inhibition.

219         Intermittent treatment was given both to test the efficacy of a prolonged duration  
220 and to determine if this strategy would allow cysts to become vulnerable by relieving  
221 drug pressure and allowing replication. Although the cysts were not eliminated, the  
222 number of cysts in treatment and controls continued to decline over time. The question

223 remains whether the ultimate nadir of cyst numbers in mice was further reduced by ELQ  
224 treatment or if the cyst number in control mice would eventually reach the low numbers  
225 achieved with ELQ-316 treatment. Interestingly, previous experiments that evaluated  
226 brain cysts over 8 weeks showed an increase in the number and size of cysts.(20) Here  
227 we observed that cyst numbers began to decrease after 7 weeks in control mice and  
228 continued to decrease out to 10 weeks. In the subsequent ELQ-334 experiment,  
229 surviving cysts did not differ from controls in distribution or have acquired cytochrome *b*  
230 resistance mutations, further underscoring the inherent drug refractive properties of  
231 cysts.

232 An oral agent to treat toxoplasmosis is optimal for prolonged courses of therapy  
233 and in settings with limited health care resources. The carbonate ester promoiety of  
234 ELQ-334 disrupted  $\pi$ - $\pi$  stacking leading to the enhanced oral bioavailability of ELQ-  
235 316 6-fold, resulting in a plasma concentration of 9.5  $\mu$ M at  $C_{max}$  and 3.6  $\mu$ M at 24 hours  
236 and the brain concentrations to 3.3  $\mu$ M at  $C_{max}$  and 0.88  $\mu$ M at 24 hours. These  
237 concentrations are more than 1,000-fold greater than the  $IC_{50}$  (50% inhibitory  
238 concentration) against *T. gondii*. The carbonate ester promoiety is also beneficial in that  
239 ELQ-334 was rapidly metabolized to ELQ-316, which limits the host exposure to the  
240 prodrug form. ELQ-334 treatment was more effective than ELQ-316 with 50% survival in  
241 mice compared to previous studies of orally administered ELQ-316, in which mice did  
242 not survive more than 8 days after completion of treatment.(9) Moreover, oral treatment  
243 with 10 mg/kg ELQ-334 was effective at decreasing the number of tissue cysts to a  
244 similar degree as intraperitoneal injections at 5 mg/kg. Despite not eradicating cysts,  
245 ELQ-334 quickly decreased the number of cysts that were established over 5 weeks

246 under conditions where meningeal inflammation would be minimal and penetration  
247 through the blood brain barrier is important. The survival of mice during prolonged  
248 administration of ELQ-316 both orally and IP also demonstrates that these doses are  
249 tolerated well and cumulative toxicity does not limit efficacy in mice.

250 Complete elimination of tissue cysts would likely have significant clinical benefit;  
251 however, a drug that achieves this goal remains elusive. That being said, further  
252 research to understand the effect of ELQ-334 on tissue cysts and their inherent  
253 resistance may provide a means to exploit the vulnerabilities of bradyzoites in deep  
254 latency and find drug combinations that eliminate cysts. More urgently, drugs for  
255 toxoplasmosis that are more effective and better tolerated are needed. Overall, ELQ-  
256 334 is a highly promising candidate for the treatment of toxoplasmosis. Compared to  
257 atovaquone, a well-tolerated, clinically used drug, ELQ-334 is more effective, achieves  
258 higher brain concentrations, and markedly less inhibition of human cytochrome *b*.(8, 28)  
259 ELQ-316 is also more potent than the other currently used drugs pyrimethamine,  
260 sulfadiazine, clindamycin, and trimethoprim-sulfamethoxazole and does not show fetal  
261 toxicity in mice.(29) Current regimens for toxoplasmosis are significantly limited by side  
262 effects that at times are severe. Given the need for better-tolerated drugs, the efficacy  
263 of ELQ-334 described in this manuscript warrants further investigation of carbonate  
264 ester prodrugs of ELQ-316 for toxoplasmosis.

## 265 **Ethics**

266 All animal procedures and protocols were carried out in strict accordance with the  
267 Public Health Service Policy on Humane Care and Use of Laboratory Animals and  
268 Association for the Assessment and Accreditation of Laboratory Animal Care guidelines.

269 The University of Michigan Committee on the Use and Care of Animals (Animal Welfare  
270 Assurance A3114–01, protocol PRO00008638) and the Institutional Animal Care and  
271 Use Committee (protocol #3276) of the Portland Veterans Administration Medical  
272 Center approved the animal protocol used for this study. All efforts were made to  
273 minimize pain and suffering.

## 274 **Methods**

### 275 **Experimental compounds**

276 Unless otherwise stated all chemicals and reagents were obtained from Sigma-  
277 Aldrich Chemical Company in St. Louis, MO (USA) or Combi-Blocks in San Diego, CA  
278 and were used as received. ELQ-316 was synthesized according to Nilsen et al.(13)  
279 Melting points were obtained in the Optimelt Automated Melting point system from  
280 Stanford Research System, Sunnyvale, CA (USA). GC-MS was obtained using an  
281 Agilent Technologies 7890B gas chromatography (30 m, DBS column set at 200°C for 2  
282 min, then at 30°C /min to 300°C with inlet temperature set at 250°C) with an Agilent  
283 Technologies 5977A mass-selective detector operating at 70 eV. Silica gel  
284 chromatography was performed using an automated flash chromatography system  
285 (Biotage Isolera One, Uppsala, Sweden). <sup>1</sup>H-NMR spectra were obtained using a  
286 Bruker AMX-400 NMR spectrometer operating at 400.14 MHz. Raw NMR data were  
287 analyzed using the iNMR Spectrum Analyst software. Chemical shifts were reported in  
288 parts million units (ppm), (δ) relative to either tetramethylsilane (TMS) as internal  
289 standard or residual solvent proton (7.26 ppm for deuterated CDCl<sub>3</sub>). Coupling constant  
290 values were reported in hertz (Hz).

291 **6-fluoro-7-methoxy-2-methyl-3-(4-(4-(trifluoromethoxy)phenoxy)phenyl)quinolin-4-**  
292 **yl ethyl carbonate (ELQ-334)**

293 To a stirred suspension of ELQ-316 (3.21 g, 7.0 mmol) in dry THF (100 ml) was  
294 added a 60% mineral oil suspension of NaH (560 mg, 14.0 mmol, 2.0 Eq) and the  
295 mixture was heated at 60°C for 30 minutes. Ethyl chloroformate (1.51 g, 14.0 mmol, 2  
296 Eq) in THF (5 ml) was added, and the reaction was heated at 60°C for 5 hours. It was  
297 then cooled to room temperature and water (10 ml) was added. The resulting mixture  
298 was filtered and separated, and the organic layer was concentrated in vacuo to give 4.1  
299 g of a white solid. The product was purified by silica gel flash chromatography using  
300 40% ethyl acetate in hexanes to give 3.52 g (95 % yield) of ELQ-334 as a white solid.  
301 GC-MS shows one peak with 531 M<sup>+</sup> (32%), 281 (100 %). MP: 140.1-140.5 °C, <sup>1</sup>H-NMR  
302 (400 MHz; CDCl<sub>3</sub>): δ 7.52 (d, *J* = 8.0 Hz, 1H), 7.48 (d, *J* = 11.2 Hz, 1H), 7.30-7.28 (m,  
303 2H), 7.24-7.21 (m, 2H), 7.11-7.06 (m, 4H), 4.15 (q, *J* = 7.1 Hz, 2H), 4.04 (s, 3H), 2.53 (s,  
304 3H), 1.22 (t, *J* = 7.1 Hz, 3H). For X-Ray analysis, ELQ-334 was re-crystallized by slow  
305 evaporation from an ethanol solution.

306 **X-ray crystallography**

307 Diffraction intensities for ELQ-334 were collected at 100 K on a Rigaku XtaLAB  
308 SynergyS diffractometer using CuKα radiation, λ = 1.54184 Å. The space group was  
309 determined based on intensity statistics. Absorption correction was applied by  
310 SADABS.(30) The structure was solved by direct methods and Fourier techniques and  
311 refined on *F*<sup>2</sup> using full matrix least-squares procedures. All non-H atoms were refined  
312 with anisotropic thermal parameters. H atoms in Me groups were refined in calculated  
313 positions in a rigid group model without restrictions on its rotation around C-C bonds

314 (HFIX 138 in SHELXTL).(31) Other H atoms were found on the residual density map  
315 and refined without any restrictions with isotropic thermal parameters. In the crystal  
316 there are two symmetrical molecules. All calculations were performed using the Bruker  
317 SHELXL-2014 package.(31)

### 318 **Pharmacokinetic analysis of ELQ-316 and ELQ-334**

319 Plasma and brain concentrations of compounds were evaluated in CF-1 mice  
320 with access to food and water ad libitum at all times. ELQ-334 and ELQ-316 were  
321 dissolved in PEG 400 to a dose of 10 mg/kg with ELQ-334 adjusted to the molar  
322 equivalency of ELQ-316. These solutions were administered orally by gavage (0.1 ml  
323 per mouse). Blood samples were collected at 0.5, 1, 2, 4, 8, 24, 48, 72 and 96 h post  
324 dose (n = 3 mice per time point), with a maximum of two samples obtained from each  
325 mouse, via tail poke. Blood was collected directly into heparinized polypropylene tubes  
326 containing a cocktail of protease inhibitor, potassium fluoride, 1 M acetic acid and EDTA  
327 to minimize the potential for *ex vivo* degradation of compounds in blood/plasma  
328 samples. All plasma samples were snap-frozen on dry ice and then stored at  $-80^{\circ}\text{C}$   
329 until analysis within 6 weeks. After the blood for the 4h, 24h and 96h time points was  
330 collected, 3 mice for each drug condition were euthanized and the brains were  
331 collected, washed with PBS and snap-frozen on dry ice and stored at  $-80^{\circ}\text{C}$ . Following  
332 protein precipitation with acetonitrile (2-fold volume ratio), plasma samples were  
333 analyzed via ultraperformance liquid chromatography (UPLC)-MS (Waters Micromass  
334 Quattro Premier coupled to an Acquity UPLC device operating in positive electrospray  
335 ionization multiple-reaction monitoring mode). Analyte concentrations were determined  
336 relative to calibration curves prepared in blank mouse plasma.

337 **Parasite strains and passage in mice**

338 ME49 (genotype II) strain parasites were used for all chronic infection  
339 experiments but were obtained from two different laboratories. MS-ME49 was obtained  
340 from Dr. Michael Shaw (University of Michigan) who previously received it from Dr. Alan  
341 Sher's lab (National Institutes of Health). CH-ME49 was obtained from Dr. Christopher  
342 Hunter's lab (University of Pennsylvania). Both versions of ME49 were maintained in  
343 Swiss Webster or CBA/J mice by serial passage at 8 to 12-week intervals. A Type I RH  
344 *T. gondii* strain expressing luciferase and green fluorescence protein was used for the  
345 acute infection model.

346 **Treatment of latent toxoplasmosis**

347 Unless otherwise noted, all experiments involved seven to eight-week-old  
348 recipient CBA/J female mice infected with 18 cysts of ME49 strain parasites in brain  
349 homogenate from a 5-week infected CBA/J donor mouse. Treatment of recipient mice  
350 commenced at 5-weeks post-infection and consisted of various schemes, as described  
351 below and in the results section. Experimental compounds were administered either  
352 intraperitoneally (in 0.1 ml DMSO) or via oral gavage (in 0.1 ml PEG400). Mice were  
353 humanely euthanized 2 weeks following the final injection. The mouse brains were  
354 placed in 1 ml sterile PBS and individually minced with scissors, vortexed and  
355 homogenized by passage 3-4 times through a 22 g needle and syringe. Three 10  $\mu$ l  
356 samples of each brain homogenate were placed under 24x24 mm cover slips and  
357 enumerated by phase contrast microscopy blindly i.e., without the enumerating  
358 individual having knowledge of the sample identifications.



359           Seventeen groups of mice were included in the course treatment experiments  
360 (Fig. 1A and B). Brain cysts in group 1 were enumerated at 5 weeks post-infection (0  
361 weeks treatment) as a reference for the time course. Groups 2, 5, 8, 11, and 14 were  
362 treated with vehicle (DMSO) for 1-6 weeks, respectively. Groups 3, 6, 9, 12, and 15  
363 were treated with 5 mg/kg ELQ-271 for 1-6 weeks, respectively. Groups 4, 7, 10, 13,  
364 and 16 were treated with 5 mg/kg ELQ-316 for 1-6 weeks, respectively. Treatment was  
365 administered daily via intraperitoneal injection. Groups 2-13 were euthanized one day  
366 following their last treatment for enumeration of brain cysts. Groups consisted of 5 mice  
367 each except for groups 14-16, which included 5, 13, and 10 mice, respectively because  
368 of uneven attrition due to infection. Group 17 contained 4 uninfected mice. Following 6  
369 weeks of treatment, groups 14-17 received dexamethasone (10 mg/ml) in their drinking  
370 water to elicit immunosuppression for assessing viability of residual cysts post-  
371 treatment.

372           To assess the distribution of residual cysts in the brain together with testing  
373 efficacy of secondary treatment (Fig. 5), groups 1-3 consisting of 20 mice each were  
374 infected for 5 weeks and orally treated with vehicle (PEG400) or 3 mg/kg or 10 mg/kg  
375 ELQ-334 daily for 2 weeks. As uninfected negative controls, groups 4-6 (5 mice each)  
376 were treated with vehicle (PEG400) or 3 mg/kg or 10 mg/kg ELQ-334 daily for 2 weeks.  
377 Two weeks following the last treatment, mice in all groups were humanely euthanized  
378 and each brain was split into right and left hemispheres. The right hemisphere was  
379 homogenized for cyst counts, measurement of cyst size by microscopy, and for  
380 extraction of genomic DNA as described below. To assess viability of residual cysts,  
381 brain homogenates were pooled within groups and injected into naïve 7-week-old

382 female CD1 mice (3 mice per group) at 1, 0.1, 0.01, and 0.001 brain equivalents by  
383 mixing with 0, 0.9, 0.99, or 0.999 brain equivalent homogenates from groups 4-6 i.e.,  
384 uninfected, treated negative control mice, to ensure injection of equivalent brain  
385 material. CD1 mice were examined for brain cysts 5 weeks post-transfer. The left  
386 hemisphere was processed as described below. Eighteen cysts in pooled homogenates  
387 from groups 1 and 3 were also used to infect naïve CBA/J mice (10 mice per group) for  
388 secondary treatment. Five weeks post-infection these mice were orally treated with  
389 vehicle (PEG400) or 10 mg/kg ELQ-334 daily for 2 weeks. Two weeks following the last  
390 treatment, brain cysts were quantified to measure the efficacy of secondary treatment.

391 For comparing the sensitivity of MS-ME49 and CH-ME49 to treatment (Fig. 6),  
392 groups 1 and 2 were infected with MS-ME49 and groups 3 and 4 were infected with CH-  
393 ME49. Each group contained 15 mice. Five weeks post-infection daily oral treatment  
394 was given to groups 1 and 3 with vehicle (PEG400) and groups 2 and 4 with 10 mg/kg  
395 ELQ-334. Brain cysts were enumerated 3 weeks after the last treatment. Statistical  
396 analyses of cyst burden were performed using Mann-Whitney tests. Outliers identified  
397 with the Grubb's test were excluded.

### 398 **Quantitative analysis of brain slices**

399 Brains of infected and uninfected mice were dissected, weighed, flash frozen,  
400 and stored at -20°C. Tissue was then thawed and sliced into sequential 1 mm sections  
401 using a model 51425 tissue slicer (Stoelting, Wood Dale, IL). Brain slices were  
402 homogenized with 50 ul of PBS in 1.5 ml Eppendorf™ tubes using a Kontes® pellet  
403 pestle (VWR™ cat. No. KT749521-1500), followed by passaging through a 17-  
404 gauge needle attached to a 1 mL syringe. Standard samples were generated by

405 adding *T. gondii* tachyzoites to 25 mg samples of uninfected brain tissue samples at  
406 concentrations from 0.1 to  $5 \times 10^8$  parasites/mg tissue. Whole genomic DNA from  
407 samples and standards was extracted and purified using the DNAeasy Blood and  
408 Tissue Kit by Qiagen<sup>TM</sup> (cat. no. 69504) according to manufacturer's instructions. 50 ng  
409 of genomic DNA was used per sample to run qPCR using primers against a  
410 *Toxoplasma*-specific 529 bp repeat element (Tox-9 Forward, 5'  
411 AGGAGAGATATCAGGACTGTAG; Tox-11 Reverse, 5'  
412 GCGTCGTCTCGTCTAGATCG). All samples were quantified by qPCR using the Bio-  
413 Rad SYBR Green master mix reagent (ThermoFisher Scientific<sup>TM</sup> cat. no. 4309155) on  
414 an Applied Biosystems Step One Plus qPCR instrument. Treated and control sample  
415 threshold cycle (CT) values were compared against the standard curve to extrapolate  
416 the number of *T. gondii* genomes per brain slice. Samples with a CT value above 40  
417 were considered to have no detectable *T. gondii* genomes present.

#### 418 **Treatment of acute toxoplasmosis**

419 CF-1 mice that were 4-6 weeks old were inoculated intraperitoneally with 10,000  
420 virulent Type I RH *T. gondii* tachyzoites that express firefly luciferase and GFP. After 24  
421 hours, compounds were dissolved and administered in PEG400 via oral gavage daily  
422 for five days. Vehicle only control groups and treatment groups consisted of 4 mice per  
423 group. Mice were monitored for signs of infection, and underwent bioluminescence  
424 imaging on day 4, 6, 13 and 29. Mice were injected IP with a dose of 0.1 ml of D-  
425 luciferin (150 mg substrate/kg of body weight) dissolved in PBS. Three minutes after  
426 luciferin injection, mice were anesthetized using inhaled isoflurane and positioned  
427 ventral side up on a heated platform. Bioluminescent images were obtained using an

428 IVIS Spectrum CT and processed using Living Image software (Perkin Elmer). Mice that  
429 developed signs of severe infection, such as >10% weight loss, lethargy, or lack of self-  
430 grooming, or at 33 days, were humanely euthanized. Analysis of survival and  
431 differences of the tissue burden of *T. gondii* infection were performed using a logrank  
432 test and unpaired t-test, respectively. GraphPad Prism 7.0 software was used for  
433 statistical analysis.

#### 434 **Cytochrome *b* gene sequencing**

435 DNA was isolated from 6 samples of MS-ME49 *T. gondii* cysts, CH-ME49 cysts  
436 and RH strain tachyzoites using the DNeasy Blood & Tissue Purification Kit (Qiagen).  
437 The cytochrome *b* coding sequences were amplified from genomic DNA and cDNA by  
438 PCR with primers 5'ATGGTTTCGAGAACAACACTCAGT,  
439 3'GTATAAGCATAGAACCAATCCGGT and Phusion DNA polymerase yielding a single  
440 PCR product visualized on an agarose gel. Control PCR reactions without DNA did not  
441 yield PCR products. Amplicons were sequenced using sequencing primers  
442 5'CTACCATGGGGACAAATGAGTTTCTGGGGTGCTACAGT and  
443 3'ACCATTCTGGTACGATATGAAGTGGTGTTAC. Protein alignment was performed  
444 with MUSCLE (Multiple Sequence Comparison by Log-Expectation).

#### 445 **Acknowledgements**

446 This work was supported by Career Development Award BX002440 and VA Merit  
447 Review Award BX004522 to J.S.D. from the U.S. Department of Veterans Affairs  
448 Biomedical Laboratory Research and Development. We also acknowledge support for  
449 M.K.R. from NIH R01 AI100569, Peer Reviewed Medical Research Program Project  
450 PR130649, and VA Merit Review Funds from the U.S. Department of Veterans Affairs

451 BX003312. The work was also supported by a grant from the Stanley Medical Research  
452 Institute to V.B.C.

453

- 454 1. Tenter AM, Heckerth AR, Weiss LM. 2000. *Toxoplasma gondii*: from animals to  
455 humans. *Int J Parasitol* 30:1217-58.
- 456 2. Jones JL, Parise ME, Fiore AE. 2014. Neglected parasitic infections in the United States:  
457 toxoplasmosis. *Am J Trop Med Hyg* 90:794-9.
- 458 3. Shapiro K, VanWormer E, Packham A, Dodd E, Conrad PA, Miller M. 2019. Type X strains  
459 of *Toxoplasma gondii* are virulent for southern sea otters (*Enhydra lutris nereis*) and  
460 present in felids from nearby watersheds. *Proc Biol Sci* 286:20191334.
- 461 4. Yan J, Huang B, Liu G, Wu B, Huang S, Zheng H, Shen J, Lun ZR, Wang Y, Lu F. 2013.  
462 Meta-analysis of prevention and treatment of toxoplasmic encephalitis in HIV-infected  
463 patients. *Acta Trop* 127:236-44.
- 464 5. Katlama C, De Wit S, O'Doherty E, Van Glabeke M, Clumeck N. 1996. Pyrimethamine-  
465 clindamycin vs. pyrimethamine-sulfadiazine as acute and long-term therapy for  
466 toxoplasmic encephalitis in patients with AIDS. *Clin Infect Dis* 22:268-75.
- 467 6. Porter SB, Sande MA. 1992. Toxoplasmosis of the central nervous system in the acquired  
468 immunodeficiency syndrome. *N Engl J Med* 327:1643-8.
- 469 7. Lin D, Tucker MJ, Rieder MJ. 2006. Increased adverse drug reactions to antimicrobials  
470 and anticonvulsants in patients with HIV infection. *Ann Pharmacother* 40:1594-601.
- 471 8. Doggett JS, Nilsen A, Forquer I, Wegmann KW, Jones-Brando L, Yolken RH, Bordon C,  
472 Charman SA, Katneni K, Schultz T, Burrows JN, Hinrichs DJ, Meunier B, Carruthers VB,  
473 Riscoe MK. 2012. Endochin-like quinolones are highly efficacious against acute and  
474 latent experimental toxoplasmosis. *Proc Natl Acad Sci U S A* 109:15936-41.
- 475 9. McConnell EV, Bruzual I, Pou S, Winter R, Dodean RA, Smilkstein MJ, Krollenbrock A,  
476 Nilsen A, Zakharov LN, Riscoe MK, Doggett JS. 2018. Targeted Structure-Activity Analysis  
477 of Endochin-like Quinolones Reveals Potent Qi and Qo Site Inhibitors of *Toxoplasma*  
478 *gondii* and *Plasmodium falciparum* Cytochrome bc1 and Identifies ELQ-400 as a  
479 Remarkably Effective Compound against Acute Experimental Toxoplasmosis. *ACS Infect*  
480 *Dis*.
- 481 10. Nilsen A, LaCrue AN, White KL, Forquer IP, Cross RM, Marfurt J, Mather MW, Delves MJ,  
482 Shackleford DM, Saenz FE, Morrisey JM, Steuten J, Mutka T, Li Y, Wirjanata G, Ryan E,  
483 Duffy S, Kelly JX, Sebayang BF, Zeeman AM, Noviyanti R, Sinden RE, Kocken CH, Price RN,  
484 Avery VM, Angulo-Barturen I, Jimenez-Diaz MB, Ferrer S, Herreros E, Sanz LM, Gamo FJ,  
485 Bathurst I, Burrows JN, Siegl P, Guy RK, Winter RW, Vaidya AB, Charman SA, Kyle DE,  
486 Manetsch R, Riscoe MK. 2013. Quinolone-3-diarylethers: a new class of antimalarial  
487 drug. *Sci Transl Med* 5:177ra37.
- 488 11. Lawres LA, Garg A, Kumar V, Bruzual I, Forquer IP, Renard I, Virji AZ, Boulard P,  
489 Rodriguez EX, Allen AJ, Pou S, Wegmann KW, Winter RW, Nilsen A, Mao J, Preston DA,  
490 Belperron AA, Bockenstedt LK, Hinrichs DJ, Riscoe MK, Doggett JS, Ben Mamoun C. 2016.

- 491 Radical cure of experimental babesiosis in immunodeficient mice using a combination of  
492 an endochin-like quinolone and atovaquone. *J Exp Med*.
- 493 12. Miley GP, Pou S, Winter R, Nilsen A, Li Y, Kelly JX, Stickles AM, Mather MW, Forquer IP,  
494 Pershing AM, White K, Shackelford D, Saunders J, Chen G, Ting LM, Kim K, Zakharov LN,  
495 Donini C, Burrows JN, Vaidya AB, Charman SA, Riscoe MK. 2015. ELQ-300 prodrugs for  
496 enhanced delivery and single-dose cure of malaria. *Antimicrob Agents Chemother*  
497 59:5555-60.
- 498 13. Nilsen A, Miley GP, Forquer IP, Mather MW, Katneni K, Li Y, Pou S, Pershing AM, Stickles  
499 AM, Ryan E, Kelly JX, Doggett JS, White KL, Hinrichs DJ, Winter RW, Charman SA,  
500 Zakharov LN, Bathurst I, Burrows JN, Vaidya AB, Riscoe MK. 2014. Discovery, synthesis,  
501 and optimization of antimalarial 4(1H)-quinolone-3-diarylethers. *J Med Chem* 57:3818-  
502 34.
- 503 14. Zhang Y, Huo M, Zhou J, Xie S. 2010. PKSolver: An add-in program for pharmacokinetic  
504 and pharmacodynamic data analysis in Microsoft Excel. *Comput Methods Programs*  
505 *Biomed* 99:306-14.
- 506 15. Alday PH, Bruzual I, Nilsen A, Pou S, Winter R, Ben Mamoun C, Riscoe MK, Doggett JS.  
507 2017. Genetic Evidence for Cytochrome b Qi Site Inhibition by 4(1H)-Quinolone-3-  
508 Diarylethers and Antimycin in *Toxoplasma gondii*. *Antimicrob Agents Chemother* 61.
- 509 16. McFadden DC, Tomavo S, Berry EA, Boothroyd JC. 2000. Characterization of cytochrome  
510 b from *Toxoplasma gondii* and Q(o) domain mutations as a mechanism of atovaquone-  
511 resistance. *Mol Biochem Parasitol* 108:1-12.
- 512 17. Vidadala RS, Rivas KL, Ojo KK, Hulverson MA, Zambriski JA, Bruzual I, Schultz TL, Huang  
513 W, Zhang Z, Scheele S, DeRocher AE, Choi R, Barrett LK, Siddaramaiah LK, Hol WG, Fan E,  
514 Merritt EA, Parsons M, Freiberg G, Marsh K, Kempf DJ, Carruthers VB, Isoherranen N,  
515 Doggett JS, Van Voorhis WC, Maly DJ. 2016. Development of an Orally Available and  
516 Central Nervous System (CNS) Penetrant *Toxoplasma gondii* Calcium-Dependent Protein  
517 Kinase 1 (TgCDPK1) Inhibitor with Minimal Human Ether-a-go-go-Related Gene (hERG)  
518 Activity for the Treatment of Toxoplasmosis. *J Med Chem* 59:6531-46.
- 519 18. Rutaganira FU, Barks J, Dhason MS, Wang Q, Lopez MS, Long S, Radke JB, Jones NG,  
520 Maddirala AR, Janetka JW, El Bakkouri M, Hui R, Shokat KM, Sibley LD. 2017. Inhibition  
521 of Calcium Dependent Protein Kinase 1 (CDPK1) by Pyrazolopyrimidine Analogs  
522 Decreases Establishment and Reoccurrence of Central Nervous System Disease by  
523 *Toxoplasma gondii*. *J Med Chem*.
- 524 19. Benmerzouga I, Checkley LA, Ferdig MT, Arrizabalaga G, Wek RC, Sullivan WJ, Jr. 2015.  
525 Guanabenz repurposed as an antiparasitic with activity against acute and latent  
526 toxoplasmosis. *Antimicrob Agents Chemother* 59:6939-45.
- 527 20. Watts E, Zhao Y, Dhara A, Eller B, Patwardhan A, Sinai AP. 2015. Novel Approaches  
528 Reveal that *Toxoplasma gondii* Bradyzoites within Tissue Cysts Are Dynamic and  
529 Replicating Entities In Vivo. *MBio* 6:e01155-15.
- 530 21. Al-Anouti F, Tomavo S, Parmley S, Ananvoranich S. 2004. The expression of lactate  
531 dehydrogenase is important for the cell cycle of *Toxoplasma gondii*. *J Biol Chem*  
532 279:52300-11.
- 533 22. Dzierszinski F, Mortuaire M, Dendouga N, Popescu O, Tomavo S. 2001. Differential  
534 expression of two plant-like enolases with distinct enzymatic and antigenic properties

- 535 during stage conversion of the protozoan parasite *Toxoplasma gondii*. *J Mol Biol*  
536 309:1017-27.
- 537 23. Ferguson DJ, Parmley SF, Tomavo S. 2002. Evidence for nuclear localisation of two stage-  
538 specific isoenzymes of enolase in *Toxoplasma gondii* correlates with active parasite  
539 replication. *Int J Parasitol* 32:1399-410.
- 540 24. Lunghi M, Galizi R, Magini A, Carruthers VB, Di Cristina M. 2015. Expression of the  
541 glycolytic enzymes enolase and lactate dehydrogenase during the early phase of  
542 *Toxoplasma* differentiation is regulated by an intron retention mechanism. *Mol*  
543 *Microbiol* 96:1159-75.
- 544 25. Sullivan WJ, Jr., Jeffers V. 2012. Mechanisms of *Toxoplasma gondii* persistence and  
545 latency. *FEMS Microbiol Rev* 36:717-33.
- 546 26. Denton H, Roberts CW, Alexander J, Thong KW, Coombs GH. 1996. Enzymes of energy  
547 metabolism in the bradyzoites and tachyzoites of *Toxoplasma gondii*. *FEMS Microbiol*  
548 *Lett* 137:103-8.
- 549 27. Bohne W, Heesemann J, Gross U. 1994. Reduced replication of *Toxoplasma gondii* is  
550 necessary for induction of bradyzoite-specific antigens: a possible role for nitric oxide in  
551 triggering stage conversion. *Infect Immun* 62:1761-7.
- 552 28. GlaxoSmithKline Research Triangle Park N. 2019. Mepron (atovaquone oral suspension)  
553 [package insert].
- 554 29. Anghel N, Balmer V, Muller J, Winzer P, Aguado-Martinez A, Roozbehani M, Pou S,  
555 Nilsen A, Riscoe M, Doggett JS, Hemphill A. 2018. Endochin-Like Quinolones Exhibit  
556 Promising Efficacy Against *Neospora Caninum* in vitro and in Experimentally Infected  
557 Pregnant Mice. *Front Vet Sci* 5:285.
- 558 30. Sheldrick GM. 1998. Bruker/Siemens Area Detector Absorption Correction Program,  
559 Madison, WI.
- 560 31. Sheldrick GM. 2015. Crystal structure refinement with SHELXL. *Acta Crystallogr C Struct*  
561 *Chem* 71:3-8.
- 562

563

564

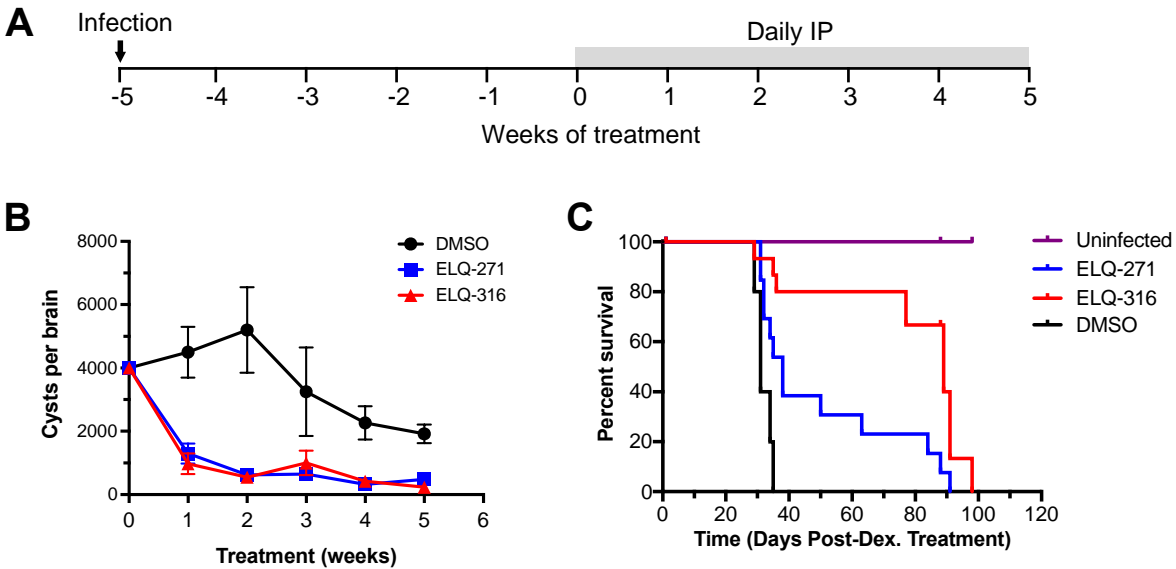

565

566 **FIG. 1.** Extended treatment with ELQ-316 and 271 reduces cysts but does not eliminate  
567 viable *T. gondii* brain cysts. (A) Mice received daily treatment via IP injection for 5  
568 weeks after being infected for 5 weeks. (B) Cysts were counted weekly in each group.  
569 Treatment with ELQ-316 and ELQ-271 decreased but did not eliminate *T. gondii* brain  
570 cysts. Cyst levels in DMSO treated mice are significantly different ( $p < 0.05$ , Mann-  
571 Whitney test) from those in ELQ-271 and ELQ-316 for all time points except for week 3  
572 between DMSO and ELQ-316. All time points and treatment groups contain cyst values  
573 from 4-8 mice except for the DMSO 4-week group, which contains data from 3 mice. (C)  
574 Mice were treated with dexamethasone following treatment with ELQs. All mice  
575 succumbed to infection. ELQ-treated mice survived longer than controls (DMSO vs.  
576 ELQ-271  $p = 0.017$ , DMSO vs ELQ-316  $p = 0.016$ ; log-rank Mantel-Cox test). Uninfected,  
577 DMSO, ELQ-271, and ELQ-316 groups contained 4, 5, 13 and 9 mice, respectively. IP,  
578 intraperitoneal; PO, *per os*; Dex, dexamethasone; error bars, Standard Deviation.



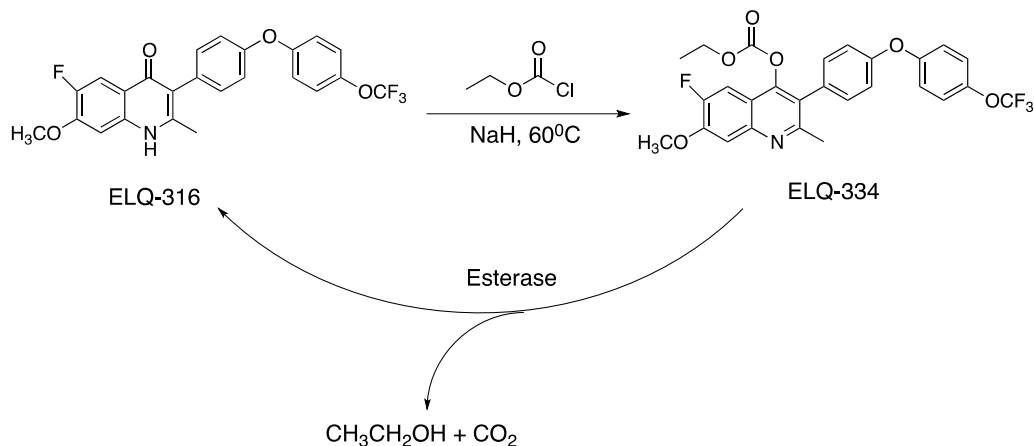

579

580

581

582 **FIG. 2.** Synthesis and presumed in vivo conversion of ELQ-316 and ELQ-334.

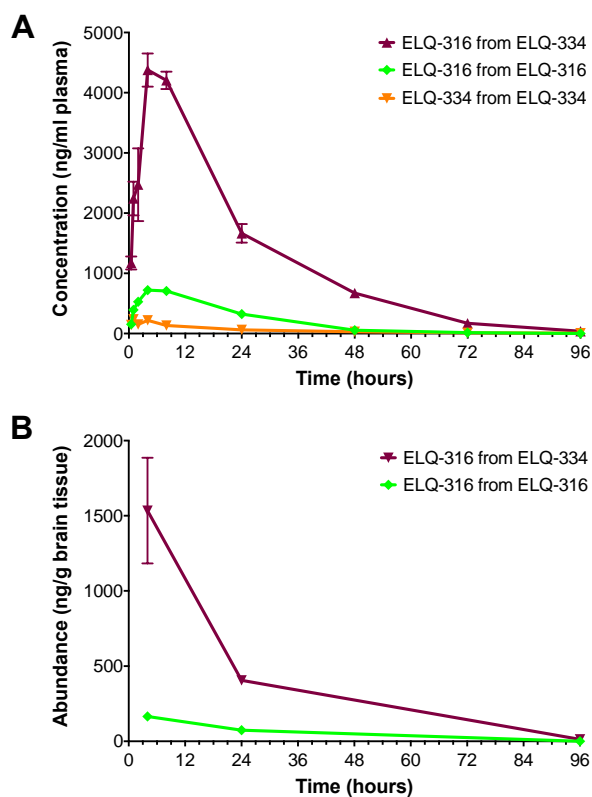

583

584 **FIG. 3.** Pharmacokinetic study of ELQ-316 and ELQ-334 from oral administration of

585 ELQ-316 or ELQ-334. Molar equivalents of 10mg/kg ELQ-316 and ELQ-334 were

586 administered in a single dose to mice via oral gavage in PEG 400. (A) Plasma  
587 concentrations of ELQ-316 and ELQ-334 over time after administration of ELQ-316 and  
588 ELQ-334. (B) Brain tissue concentrations of ELQ-316 after administration of ELQ-316 or  
589 ELQ-334. Error bars, standard error of the mean.  
590

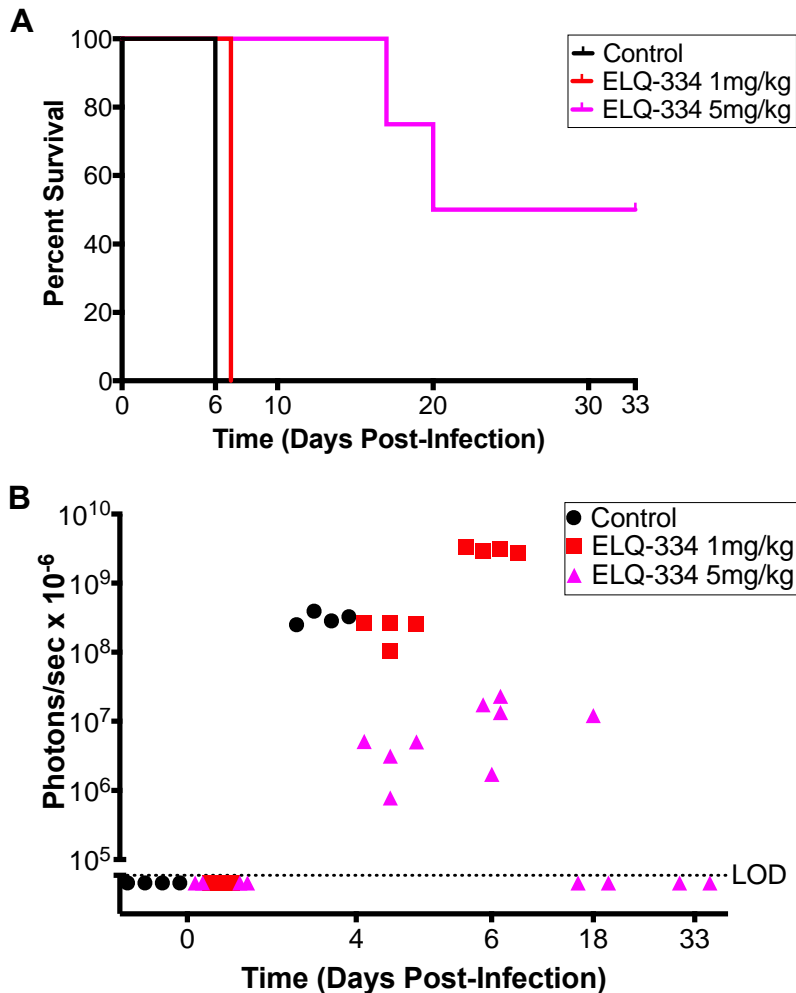

591  
592 **FIG. 4.** Efficacy of oral treatment with ELQ-334 against acute toxoplasmosis. Mice were  
593 infected with Type I *T. gondii* expressing firefly luciferase on day 0 followed by daily  
594 treatment for 5 days starting day 1. (A) Survival of mice treated with 5 mg/kg ELQ-334

595 was statistically greater than controls,  $p=0.008$  calculated by log-rank test. (B)  
 596 Luminescence in mice measured during and after treatment. LOD, limits of detection.

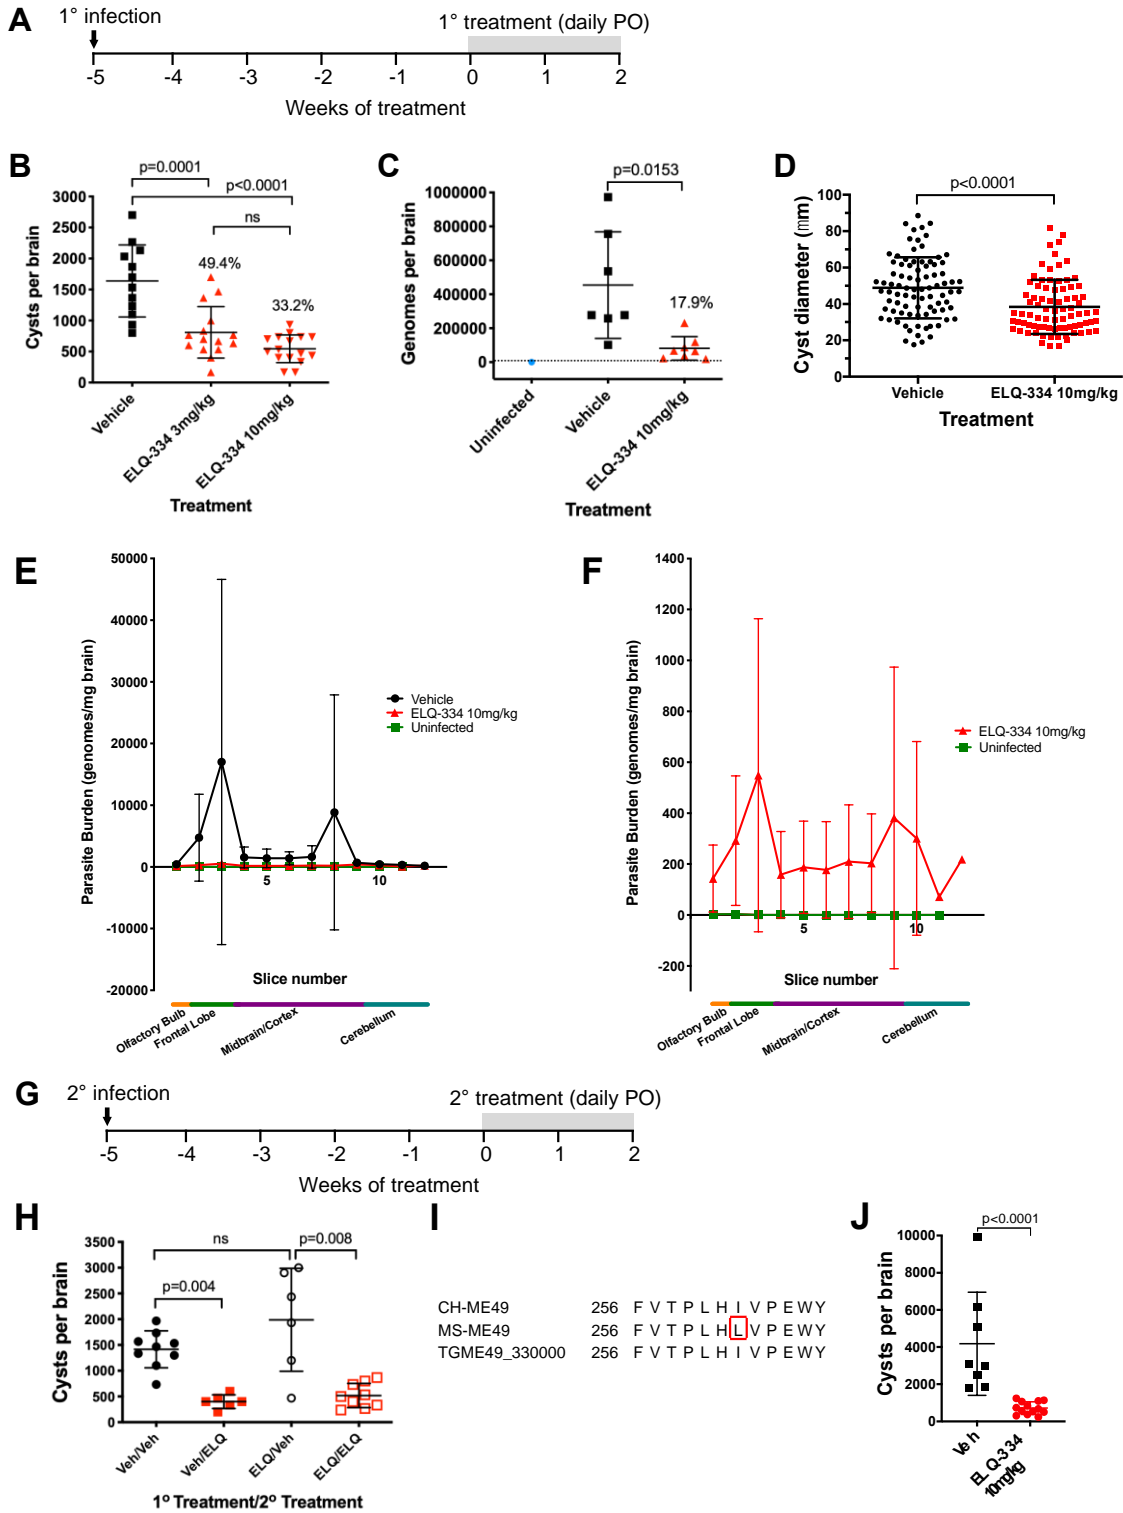

597

598 **FIG. 5.** Efficacy of oral treatment with ELQ-334 against established *T. gondii* brain  
599 cysts. (A) Mice were infected for 5 weeks prior to daily treatment for 2 weeks. (B)  
600 Number of *T. gondii* brain cyst in mice treated with 3 mg/kg and 10 mg/kg of ELQ-334.  
601 Indicated p values are from an ordinary ANOVA with multiple comparisons and Tukey's  
602 correction. One outlier was removed from the vehicle group based on ROUT analysis  
603 (Q value 0.1%). Cyst values in vehicle, ELQ-334 3 mg/kg, and ELQ-334 10 mg/kg  
604 groups are from 12, 15 and 16 mice, respectively. (C) Genomes per brain in mice  
605 treated with ELQ-334. Indicated p values are from an ordinary ANOVA with multiple  
606 comparisons and Tukey's correction. One outlier was removed from the vehicle group  
607 based on ROUT analysis (Q value 0.1%). Data are from 7 vehicle treated mice and 8  
608 ELQ-334 treated mice. (D) Diameter of cysts from mice treated with ELQ-334. P value  
609 is from a Mann-Whitney test. Data are from 5 brain samples per group, with 13-21 cysts  
610 measured per sample. (E) Distribution of *T. gondii* in the brains of infected mice. Data  
611 are from 8 mice per group for vehicle and ELQ-316. One mouse was used for the  
612 uninfected control. (F) Regraphing of the distribution of *T. gondii* in the brains of infected  
613 mice treated with ELQ-334 to visualize the pattern and its similarity to that of mice  
614 treated with vehicle in E. (G) Mice were infected with cysts from ELQ-334 treated mice  
615 for 5 weeks prior to retreatment with ELQ-334 for 2 weeks. (H) ELQ-334 treatment of  
616 mice infected with cysts from mice that were previously treated with ELQ-334. P values  
617 are from a Mann-Whitney test. Cyst levels in Veh/Veh, Veh/ELQ, ELQ/Veh and  
618 ELQ/ELQ groups are from 9, 6, 6, and 9 mice, respectively. (I) Comparison of  
619 cytochrome *b* Q<sub>0</sub> site sequence of MS-ME49 strain to CH-ME49 strain. PO, per os; veh,

620 vehicle, ELQ, ELQ-334; error bars, standard deviation. (J) ELQ-334 treatment of mice  
621 infected with CH-ME49. P value is from a Mann-Whitney test.

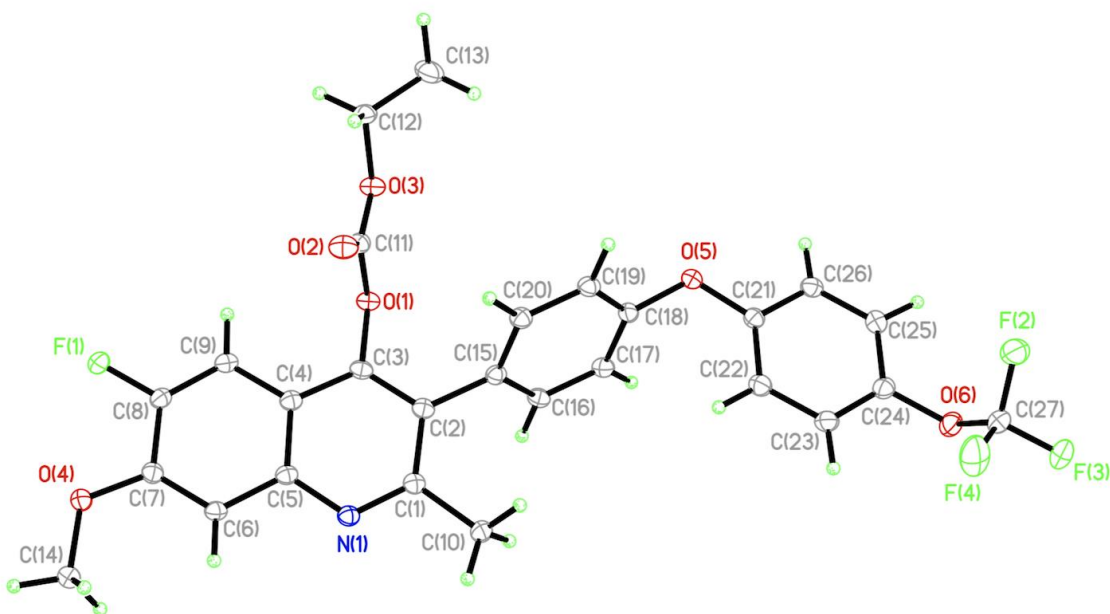

622

623 **FIG S1** Oak Ridge Thermal Ellipsoid Plot (ORTEP) of ELQ-334

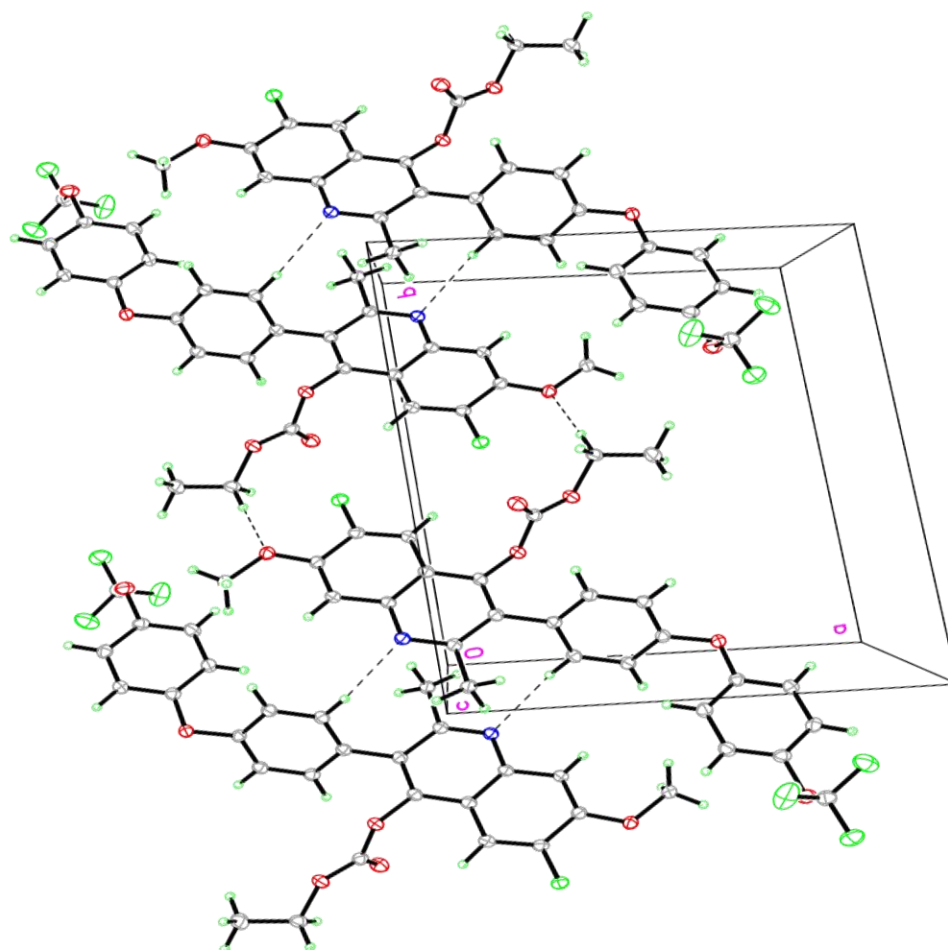

624

625 **FIG S2** A fragment of the crystal structure of ELQ-334. Hydrogen bonds are shown by dash lines.  
626 Thermal ellipsoids are drawn at the 30% probability level.
